# Supplementary material for: The Association between the Plasma Phospholipid Profile and Insulin Resistance: A Population-Based Cross-Section Study from the China Adult Chronic Disease and Nutrition Surveillance
Source: MDPI journal article supplement (doi:10.3390/nu16081205), 2024-04-18
Supplement: s1 [file s1]

# Supplemental Material

## Text S1. Phospholipidomic analysis method

### Chemicals

PL standards and deuterium labeled internal PL standards (as listed below) were purchased from Avanti Polar Lipids (USA). Other chemicals, including chloroform, methanol, acetonitrile, ammonium formate and formic acid were purchased from Sigma Aldrich (USA) and of HPLC or MS grade. Ultra-pure water was supplied by a Milli-Q system (Millipore, USA).

### List of phospholipid standards and deuterium labeled internal standards

|                    | Exact Mass |
|--------------------|------------|
| PE(14:0/14:0)      | 635.453    |
| PE(17:0/17:0)      | 719.547    |
| PE(18:0/18:0)      | 747.578    |
| PE(18:1/18:1)      | 743.547    |
| PE(18:2/18:2)      | 739.515    |
| PC(14:0/14:0)      | 677.500    |
| PC(17:0/17:0)      | 761.593    |
| PC(18:0/18:0)      | 789.625    |
| PC(18:1/18:1)      | 785.593    |
| PC(18:2/18:2)      | 781.562    |
| PC(20:0/20:0)      | 845.687    |
| PC(22:0/22:0)      |            |
| LPE(14:0)          | 425.254    |
| LPE(16:0)          | 453.286    |
| LPE(18:0)          | 481.317    |
| LPE(18:1)          | 479.300    |
| SM(d18:1/12:0)     | 646.505    |
| SM(d18:1/16:0)     | 702.568    |
| SM(d18:1/18:0)     | 730.599    |
| SM(d18:1/18:1)     | 728.583    |
| LPC(13:0)          | 453.286    |
| LPC(17:0)          | 509.348    |
| LPC(17:1)          | 507.332    |
| LPC(19:0)          | 537.379    |
| PG(14:0/14:0)      | 688.429    |
| PG(16:0/16:0)      | 744.492    |
| PG(18:0/18:0)      | 800.554    |
| PG(18:1/18:1)      | 796.523    |
| PI(16:0/16:0)      | 827.552    |
| PI(18:0/18:0)      | 883.615    |
| PI(18:1/18:1)      | 879.584    |
| PC(15:0/18:1) (d7) | 752.606    |
| LPC(18:1) (d7)     | 528.392    |
| PE(15:0/18:1) (d7) | 710.559    |

|                     |         |
|---------------------|---------|
| LPE(18:1) (d7)      | 486.345 |
| PG(15:0/18:1) (d7)  | 741.554 |
| PI(15:0/18:1) (d7)  | 829.570 |
| PS(15:0/18:1) (d7)  | 754.549 |
| SM(d18:1/18:1) (d9) | 737.640 |

### **Extraction of total phospholipid from human plasma**

All the plasma samples were thawed at 37 °C. Total PL was extracted from human plasma according to a modified Folch method. Briefly, 100 µL plasma, 10 µL deuterium labeled internal standards solution and 1.0 mL chloroform/methanol (2:1, v/v) were subjected to vortex mixing for 30 min. Then, 0.2 mL NaCl solution (0.9%) was added to the mixture. The resultant mixture was mixed for 30 min and centrifuged at 10,000 rpm for 10 min. The chloroform layer was transferred into a new tube and dried under a gentle stream of nitrogen. All the samples were redissolved in 100 µL of chloroform/methanol (2:1, v/v) before analyses.

### **Qualitative analysis of phospholipid molecular species in plasma**

PL molecular species was identified according to a HILIC-ESI-IT-TOF-MS method described in our previous publication[1]. A mixed human plasma sample was prepared by taken 10 µL each from 1053 plasma samples and mixed together. This sample was used for qualitative analysis of phospholipid molecular species. Total PL was extracted from 500 µL mixed plasma and redissolved in 50 µL of chloroform/methanol (2:1, v/v). This concentrated sample was injected into HILIC-ESI-IT-TOF-MS system. Scan data of MS, MS<sup>2</sup> and MS<sup>3</sup> were collected under ESI<sup>-</sup> mode. The MS data were collected in the range of 400-1000 m/z with 30 ms of ion accumulation in ion trap; the MS<sup>2</sup> data were collected in the range of 100-800 m/z with 50 ms of ion accumulation and 100% of collision energy; the MS<sup>3</sup> data were collected in the range of 100-700 m/z with 50 ms of ion accumulation and 100% of collision energy. All the data were collected at a loop time of 0.82 s. The PLs were preliminarily identified by comparing m/z values with calculated exact masses using LIPID MAPS Structure Database (LMSD). Detailed structures of individual molecular species were further confirmed by MS<sup>2</sup> and MS<sup>3</sup> spectra based on the fragmentation laws of PLs that described in our previous publication [1].

### **Quantitative analysis of phospholipid molecular species in human plasma**

The identified PL molecular species was quantified according to a HILIC-ESI-MS/MS method. HPLC system (Shimadzu, Japan) equipped with binary pump (LC-20AD XR), online degasser (FCV-11AL), autosampler (SIL-30AC), and thermostatic column oven (CTO-20AC) was coupled online to a quadrupole mass spectrometer (LC-MS 8060, Shimadzu Japan) equipped with an Electrospray Ionization (ESI) source for plasma PL quantification.

**Chromatography** The extracted PLs were separated on a CORTECS HILIC Column (1.6 µm, 2.1 mm X 150

mm, Waters, USA). The column temperature was set at 40 °C. Eluent A and B were water and acetonitrile/water (95/5), respectively. Both eluents contained 0.1% formic acid and 10 mM ammonium formate. The flow rate of the eluent was 0.4 mL/min. The elution gradient was as follows: 0 min, 99.5% B; 21 min, 91% B; 21.1 min, 80% B; 26 min, 80% B; 26.1 min, 99.5 % B; 32min, 99.5% B. No significant carryover of lipids was observed in blank injection (10 µL methanol) after every 25 samples.

**Mass Spectrometry** The instrument parameters were set as follows: nebulizer gas flow: 3 L/min; heat gas flow: 12 L/min; desolvation gas flow: 8 L/min; interface temperature: 250 °C; DL temperature: 180 °C; heat block temperature: 250 °C; detector voltage: 1.85 kV. The ESI source operated in positive mode for PE, PC, LPE, LPC, and SM, and in negative mode for PI and PG. The MS/MS data were collected in targeted MRM mode for all the PL molecular species identified in HILIC-ESI-IT-TOF-MS system. The m/z values of precursor and product ions were calculated based on the fragmentation laws of PLs in quadrupole system as described in our previous publication [2].

**Quantification** Individual molecular species of PL were quantified using internal standard method. Calibration curves with  $1/x^2$  as weighting factor were constructed using PL standards in a series of concentrations spiked with deuterium labeled internal standards in constant concentration (as shown in Table S4 of supplementary material). The plasma PLs were quantified using calibration curve of the PL standard from same class and with most similar acyl chain length and unsaturation degree (as shown in Table S3 of supplementary material). A QC sample was added in the sequence after every 25 samples for quality control.

## Reference

1. Song S, Cheong LZ, Man QQ, Pang SJ, Li YQ, et al. (2018) Characterization of potential plasma biomarkers related to cognitive impairment by untargeted profiling of phospholipids using the HILIC-ESI-IT-TOF-MS system. *Anal Bioanal Chem* 410: 2937-2948.
2. Song S, Liu TT, Liang X, Liu ZY, Yishake D, et al. (2021) Profiling of phospholipid molecular species in human breast milk of Chinese mothers and comprehensive analysis of phospholipidomic characteristics at different lactation stages. *Food Chem* 348: 129091.

**Table S1. Quantitative ions, concentration distribution and module information (WGCNA model) of the identified phospholipid molecular species**

| No. | Molecular species | Precursor ion (m/z) | Product ion (m/z) | Concentration (µg/L) |         |         | WGCNA module |
|-----|-------------------|---------------------|-------------------|----------------------|---------|---------|--------------|
|     |                   |                     |                   | Median               | Q1      | Q3      |              |
| 1   | PG(34:1)          | 747.5               | 281.3             | 228.3                | 322.2   | 455.5   | red          |
| 2   | PG(34:2)          | 745.5               | 279.3             | 78.8                 | 119.1   | 172.9   | red          |
| 3   | PG(36:1)          | 775.5               | 281.3             | 23.4                 | 35.2    | 51.6    | red          |
|     |                   |                     | 279.3             |                      |         |         |              |
|     | PG(36:2)          | 773.5               | 281.3             | 32.3                 | 44.3    | 62.6    | red          |
| 4   |                   |                     | 327.3             |                      |         |         |              |
| 5   | PG(36:3)          | 771.5               | 281.3             | 8.6                  | 12.7    | 19.2    | red          |
| 6   | PI(32:1)          | 807.5               | 255.3             | 118.8                | 230.9   | 517.4   | grey         |
| 7   | PI(34:0)          | 837.5               | 255.3             | 83.8                 | 124.0   | 164.1   | red          |
| 8   | PI(34:1)          | 835.5               | 255.3             | 974.2                | 1333.1  | 1817.4  | red          |
| 9   | PI(34:2)          | 833.5               | 255.3             | 1509.0               | 2022.5  | 2664.8  | red          |
| 10  | PI(35:2)          | 847.5               | 269.3             | 57.4                 | 79.4    | 110.0   | grey         |
| 11  | PI(36:1)          | 863.5               | 283.3             | 1303.0               | 1826.4  | 2368.1  | red          |
|     |                   |                     | 281.3             |                      |         |         |              |
| 12  | PI(36:2)          | 861.5               | 283.3             | 5208.8               | 6973.8  | 8807.1  | grey         |
|     |                   |                     | 283.3             |                      |         |         |              |
|     | PI(36:3)          | 859.5               | 281.3             | 848.0                | 1185.5  | 1652.3  | grey         |
| 13  |                   |                     | 255.3             |                      |         |         |              |
| 14  | PI(36:4)          | 857.5               | 255.3             | 997.1                | 1374.7  | 1936.5  | pink         |
| 15  | PI(37:4)          | 871.5               | 269.3             | 71.5                 | 103.7   | 144.7   | grey         |
| 16  | PI(38:2)          | 889.6               | 283.3             | 114.2                | 177.5   | 271.3   | grey         |
| 17  | PI(38:3)          | 887.5               | 283.3             | 1264.3               | 1761.4  | 2332.6  | red          |
|     |                   |                     | 283.3             |                      |         |         |              |
| 18  | PI(38:4)          | 885.5               | 281.3             | 10467.3              | 14232.2 | 17750.6 | red          |
| 19  | PI(38:5)          | 883.5               | 283.3             | 155.7                | 227.3   | 349.8   | grey         |
|     |                   |                     | 255.3             |                      |         |         |              |
| 20  | PI(38:6)          | 881.5               | 281.3             | 143.9                | 216.0   | 307.6   | pink         |
|     |                   |                     | 311.3             |                      |         |         |              |
| 21  | PI(40:4)          | 913.6               | 283.3             | 111.5                | 157.2   | 212.7   | red          |
| 22  | PI(40:5)          | 911.5               | 283.3             | 211.0                | 306.6   | 427.3   | pink         |
| 23  | PI(40:6)          | 909.5               | 283.3             | 284.5                | 403.8   | 568.2   | pink         |
| 24  | PE(34:1)          | 718.5               | 577.5             | 534.5                | 784.7   | 1167.4  | red          |
| 25  | PE(34:2)          | 716.5               | 575.5             | 1311.4               | 1923.9  | 2727.5  | red          |
| 26  | PE(34:3)          | 714.5               | 573.5             | 55.4                 | 85.3    | 139.6   | red          |
| 27  | PE(36:1)          | 746.5               | 605.5             | 1261.1               | 1772.6  | 2506.1  | red          |
| 28  | PE(36:2)          | 744.5               | 603.5             | 5150.1               | 7205.5  | 10640.1 | red          |
| 29  | PE(36:3)          | 742.5               | 601.5             | 1149.2               | 1653.9  | 2419.0  | red          |
| 30  | PE(36:4)          | 740.5               | 599.5             | 1281.2               | 1788.9  | 2489.4  | red          |
| 31  | PE(38:3)          | 770.5               | 629.5             | 509.6                | 708.0   | 955.4   | red          |
| 32  | PE(38:4)          | 768.5               | 627.5             | 4477.9               | 6360.2  | 8657.5  | red          |
| 33  | PE(38:5)          | 766.5               | 625.5             | 1302.5               | 1901.8  | 2584.9  | red          |
| 34  | PE(38:6)          | 764.5               | 623.5             | 2057.1               | 3320.7  | 4786.8  | red          |
| 35  | PE(38:7)          | 762.5               | 621.5             | 43.3                 | 65.1    | 90.7    | red          |
| 36  | PE(40:6)          | 792.5               | 651.5             | 1566.6               | 2533.5  | 3714.5  | red          |

|    |            |       |       |          |          |          |         |
|----|------------|-------|-------|----------|----------|----------|---------|
| 37 | PE(40:8)   | 788.5 | 647.5 | 46.7     | 67.7     | 91.6     | red     |
| 38 | PE(O-34:1) | 704.5 | 563.5 | 87.9     | 122.1    | 160.5    | black   |
| 39 | PE(O-34:2) | 702.5 | 561.5 | 69.8     | 103.6    | 145.3    | black   |
| 40 | PE(O-36:2) | 730.6 | 589.6 | 140.9    | 228.6    | 308.6    | black   |
| 41 | PE(O-36:3) | 728.5 | 587.5 | 90.2     | 122.2    | 170.6    | black   |
| 42 | PE(O-36:4) | 726.5 | 585.5 | 308.6    | 498.3    | 752.8    | black   |
| 43 | PE(O-38:2) | 758.6 | 617.6 | 39.5     | 52.8     | 67.7     | red     |
| 44 | PE(O-38:3) | 756.6 | 615.6 | 24.4     | 35.4     | 49.0     | black   |
| 45 | PE(O-38:4) | 754.6 | 613.6 | 344.7    | 551.8    | 775.7    | black   |
| 46 | PE(O-38:5) | 752.5 | 611.5 | 136.8    | 206.1    | 286.3    | black   |
| 47 | PE(O-40:4) | 782.6 | 641.6 | 74.0     | 109.8    | 145.8    | black   |
| 48 | PE(O-40:5) | 780.6 | 639.6 | 98.3     | 147.0    | 220.0    | black   |
| 49 | PE(P-34:1) | 702.5 | 561.5 | 20.3     | 36.9     | 51.8     | brown   |
| 50 | PE(P-34:2) | 700.5 | 559.5 | 48.9     | 88.8     | 130.8    | brown   |
| 51 | PE(P-36:1) | 730.6 | 589.6 | 27.1     | 47.3     | 66.5     | brown   |
| 52 | PE(P-36:2) | 728.5 | 587.5 | 153.1    | 253.6    | 356.1    | brown   |
| 53 | PE(P-36:3) | 726.5 | 585.5 | 12.8     | 22.4     | 35.4     | brown   |
| 54 | PE(P-36:4) | 724.5 | 583.5 | 130.7    | 238.4    | 365.3    | brown   |
| 55 | PE(P-36:5) | 722.5 | 581.5 | 7.3      | 13.4     | 26.4     | brown   |
| 56 | PE(P-38:4) | 752.5 | 611.5 | 264.0    | 506.7    | 718.4    | brown   |
| 57 | PE(P-38:5) | 750.5 | 609.5 | 165.6    | 327.5    | 491.4    | brown   |
| 58 | PE(P-38:6) | 748.5 | 607.5 | 101.2    | 202.7    | 330.3    | brown   |
| 59 | PE(P-40:4) | 780.6 | 639.6 | 25.3     | 51.2     | 74.7     | brown   |
| 60 | PE(P-40:5) | 778.6 | 637.6 | 28.8     | 58.6     | 92.3     | brown   |
| 61 | PE(P-40:6) | 776.5 | 635.5 | 127.9    | 262.0    | 396.7    | brown   |
| 62 | PE(P-40:7) | 774.5 | 633.5 | 74.1     | 156.0    | 235.8    | brown   |
| 63 | PE(P-40:8) | 772.5 | 631.5 | 10.0     | 21.4     | 34.5     | brown   |
| 64 | PE(P-42:4) | 808.6 | 667.6 | 8.1      | 12.7     | 18.2     | brown   |
| 65 | PE(P-42:5) | 806.6 | 665.6 | 9.5      | 18.1     | 27.4     | magenta |
| 66 | PE(P-42:6) | 804.6 | 663.6 | 16.0     | 31.0     | 49.5     | brown   |
| 67 | PE(P-42:7) | 802.6 | 661.6 | 7.1      | 13.7     | 21.9     | brown   |
| 68 | PE(P-42:8) | 800.5 | 659.5 | 4.3      | 8.9      | 14.2     | brown   |
| 69 | PE(P-44:4) | 836.6 | 695.6 | 2.2      | 3.5      | 5.1      | magenta |
| 70 | PE(P-44:5) | 834.6 | 693.6 | 5.9      | 9.8      | 14.4     | magenta |
| 71 | PE(P-44:6) | 832.6 | 691.6 | 6.3      | 10.2     | 15.3     | magenta |
| 72 | PE(P-44:7) | 830.6 | 689.6 | 3.9      | 7.2      | 11.1     | magenta |
| 73 | PE(P-44:8) | 828.6 | 687.6 | 2.5      | 4.6      | 7.4      | magenta |
| 74 | PE(P-46:6) | 860.6 | 719.6 | 1.0      | 1.7      | 2.8      | magenta |
| 75 | PE(P-46:7) | 858.6 | 717.6 | 2.4      | 4.0      | 6.4      | magenta |
| 76 | PE(P-46:8) | 856.6 | 715.6 | 1.6      | 2.7      | 4.3      | magenta |
| 77 | PC(30:0)   | 706.5 | 184.1 | 668.8    | 1678.0   | 2949.9   | grey    |
| 78 | PC(32:0)   | 734.5 | 184.1 | 9981.9   | 12065.0  | 14318.7  | red     |
| 79 | PC(32:1)   | 732.5 | 184.1 | 1046.0   | 1535.3   | 2196.1   | red     |
| 80 | PC(32:2)   | 730.5 | 184.1 | 1361.6   | 1910.0   | 2491.6   | red     |
| 81 | PC(34:1)   | 760.6 | 184.1 | 202354.6 | 256780.0 | 313300.3 | red     |
| 82 | PC(34:2)   | 758.5 | 184.1 | 411734.0 | 472010.0 | 537916.1 | grey    |
| 83 | PC(34:3)   | 756.5 | 184.1 | 12120.2  | 16194.5  | 21474.5  | red     |
| 84 | PC(35:1)   | 774.6 | 184.1 | 514.6    | 676.8    | 867.0    | yellow  |
| 85 | PC(35:2)   | 772.6 | 184.1 | 5558.2   | 6941.7   | 8251.6   | yellow  |

|     |              |       |       |          |          |          |             |
|-----|--------------|-------|-------|----------|----------|----------|-------------|
| 86  | PC(35:3)     | 770.5 | 184.1 | 2447.2   | 3284.5   | 4199.7   | yellow      |
| 87  | PC(36:1)     | 788.6 | 184.1 | 9172.5   | 11469.3  | 14121.1  | red         |
| 88  | PC(36:2)     | 786.6 | 184.1 | 152280.3 | 184331.9 | 216448.1 | grey        |
| 89  | PC(36:3)     | 784.6 | 184.1 | 59599.9  | 73530.4  | 88964.0  | red         |
| 90  | PC(36:4)     | 782.5 | 184.1 | 76590.1  | 96994.6  | 120773.4 | pink        |
| 91  | PC(36:5)     | 780.5 | 184.1 | 4304.4   | 6736.3   | 11376.5  | grey        |
| 92  | PC(37:2)     | 800.6 | 184.1 | 1167.0   | 1448.0   | 1757.5   | yellow      |
| 93  | PC(37:3)     | 798.6 | 184.1 | 1343.8   | 1673.6   | 2033.3   | yellow      |
| 94  | PC(37:4)     | 796.6 | 184.1 | 6977.1   | 9147.1   | 11045.7  | yellow      |
| 95  | PC(38:2)     | 814.6 | 184.1 | 5223.8   | 6669.7   | 8509.2   | red         |
| 96  | PC(38:3)     | 812.6 | 184.1 | 5861.8   | 7640.8   | 9647.3   | pink        |
| 97  | PC(38:4)     | 810.6 | 184.1 | 49489.7  | 64999.2  | 80486.9  | pink        |
| 98  | PC(38:5)     | 808.6 | 184.1 | 6668.4   | 8767.2   | 11659.7  | grey        |
| 99  | PC(38:6)     | 806.5 | 184.1 | 29599.4  | 40459.0  | 54122.8  | pink        |
| 100 | PC(40:4)     | 838.6 | 184.1 | 1404.0   | 1857.9   | 2534.2   | grey        |
| 101 | PC(40:5)     | 836.6 | 184.1 | 4068.7   | 5370.9   | 6827.8   | pink        |
| 102 | PC(40:6)     | 834.6 | 184.1 | 15099.5  | 20764.8  | 27646.1  | pink        |
| 103 | PC(40:7)     | 832.6 | 184.1 | 5675.8   | 8630.1   | 11627.3  | salmon      |
| 104 | PC(40:8)     | 830.5 | 184.1 | 776.2    | 1149.5   | 1627.0   | salmon      |
| 105 | PC(42:4)     | 850.6 | 184.1 | 374.4    | 514.4    | 713.4    | grey        |
| 106 | PC(42:5)     | 864.6 | 184.1 | 474.5    | 701.3    | 1089.0   | cyan        |
| 107 | PC(42:6)     | 862.6 | 184.1 | 674.8    | 1015.3   | 1483.6   | salmon      |
| 108 | PC(42:7)     | 860.6 | 184.1 | 835.5    | 1192.2   | 1787.4   | salmon      |
| 109 | PC(42:8)     | 858.6 | 184.1 | 768.0    | 1089.5   | 1478.8   | salmon      |
| 110 | PC(42:9)     | 856.6 | 184.1 | 356.3    | 521.2    | 789.6    | salmon      |
| 111 | PC(44:4)     | 894.7 | 184.1 | 204.9    | 288.2    | 406.6    | grey        |
| 112 | PC(34:1(OH)) | 776.6 | 184.1 | 75.1     | 154.0    | 381.1    | grey        |
| 113 | PC(34:2(OH)) | 774.5 | 184.1 | 213.5    | 609.9    | 1924.0   | grey        |
| 114 | PC(36:4(OH)) | 798.5 | 184.1 | 170.7    | 469.3    | 2439.5   | grey        |
| 115 | PC(O-32:0)   | 720.6 | 184.1 | 4920.2   | 6275.9   | 7825.9   | yellow      |
| 116 | PC(P-34:1)   | 744.6 | 184.1 | 2372.7   | 3619.8   | 5032.2   | purple      |
| 117 | PC(P-34:2)   | 742.6 | 184.1 | 6905.4   | 10278.4  | 13679.7  | purple      |
| 118 | PC(P-36:2)   | 770.6 | 184.1 | 1168.2   | 1722.1   | 2708.6   | purple      |
| 119 | PC(P-36:3)   | 768.6 | 184.1 | 1085.4   | 1682.5   | 2346.4   | tan         |
| 120 | PC(P-36:4)   | 766.6 | 184.1 | 71.1     | 109.4    | 192.1    | tan         |
| 121 | PC(P-38:4)   | 794.6 | 184.1 | 2822.6   | 4590.4   | 6775.4   | purple      |
| 122 | PC(P-38:5)   | 792.6 | 184.1 | 2853.6   | 4679.0   | 6872.4   | purple      |
| 123 | PC(P-38:6)   | 790.5 | 184.1 | 1568.7   | 2509.4   | 3900.2   | purple      |
| 124 | PC(P-40:4)   | 822.6 | 184.1 | 226.3    | 350.2    | 506.5    | tan         |
| 125 | PC(P-40:5)   | 820.6 | 184.1 | 523.8    | 870.4    | 1227.5   | tan         |
| 126 | PC(P-40:6)   | 818.6 | 184.1 | 1165.7   | 1872.1   | 2814.1   | purple      |
| 127 | PC(P-40:7)   | 816.6 | 184.1 | 618.5    | 999.2    | 1499.0   | purple      |
| 128 | PC(P-42:4)   | 866.5 | 184.1 | 256.4    | 363.2    | 503.9    | tan         |
| 129 | PC(P-42:5)   | 848.6 | 184.1 | 603.8    | 886.7    | 1259.1   | greenyellow |
| 130 | PC(P-42:6)   | 846.5 | 184.1 | 431.1    | 661.5    | 935.6    | greenyellow |
| 131 | PC(P-44:5)   | 876.7 | 184.1 | 516.7    | 753.6    | 1091.0   | greenyellow |
| 132 | PC(P-44:6)   | 874.6 | 184.1 | 514.5    | 779.0    | 1079.5   | greenyellow |
| 133 | PC(P-44:7)   | 872.6 | 184.1 | 173.0    | 263.2    | 369.8    | greenyellow |
| 134 | PC(P-46:5)   | 904.7 | 184.1 | 336.9    | 803.2    | 1323.5   | grey        |

|     |             |       |       |         |         |         |             |
|-----|-------------|-------|-------|---------|---------|---------|-------------|
| 135 | PC(P-46:6)  | 902.7 | 184.1 | 41.7    | 62.9    | 96.2    | tan         |
| 136 | PC(P-46:7)  | 900.7 | 184.1 | 88.4    | 135.9   | 204.0   | greenyellow |
| 137 | LPE(14:0)   | 426.2 | 285.2 | 0.6     | 1.2     | 2.1     | red         |
| 138 | LPE(16:0)   | 454.3 | 313.3 | 155.4   | 207.2   | 271.0   | blue        |
| 139 | LPE(18:0)   | 482.3 | 341.3 | 667.3   | 864.7   | 1127.1  | blue        |
| 140 | LPE(18:1)   | 480.3 | 339.3 | 347.7   | 460.8   | 645.6   | red         |
| 141 | LPE(18:2)   | 478.3 | 337.3 | 276.5   | 445.8   | 693.4   | grey        |
| 142 | LPE(20:4)   | 502.3 | 361.3 | 328.3   | 498.4   | 806.3   | grey        |
| 143 | LPE(22:4)   | 530.3 | 389.3 | 15.8    | 28.8    | 51.6    | grey        |
| 144 | LPE(22:5)   | 528.3 | 387.3 | 31.1    | 47.5    | 71.1    | grey        |
| 145 | LPE(22:6)   | 526.3 | 385.3 | 306.6   | 429.9   | 638.6   | grey        |
| 146 | LPE(24:0)   | 566.4 | 425.4 | 8.0     | 10.7    | 14.1    | grey        |
| 147 | LPE(P-18:0) | 466.3 | 325.3 | 0.2     | 0.5     | 1.2     | grey        |
| 148 | LPC(14:0)   | 468.3 | 184.1 | 377.4   | 540.8   | 786.9   | blue        |
| 149 | LPC(16:0)   | 496.3 | 184.1 | 50108.5 | 61730.6 | 78434.0 | blue        |
| 150 | LPC(16:1)   | 494.3 | 184.1 | 873.0   | 1116.6  | 1451.8  | blue        |
| 151 | LPC(17:0)   | 510.3 | 184.1 | 699.2   | 954.8   | 1366.7  | blue        |
| 152 | LPC(18:0)   | 524.3 | 184.1 | 22830.1 | 28293.6 | 36269.9 | blue        |
| 153 | LPC(18:1)   | 522.3 | 184.1 | 12225.8 | 15952.0 | 20804.7 | blue        |
| 154 | LPC(18:2)   | 520.3 | 184.1 | 19418.6 | 24593.1 | 31183.1 | blue        |
| 155 | LPC(18:3)   | 518.3 | 184.1 | 218.5   | 338.1   | 510.6   | grey        |
| 156 | LPC(19:0)   | 538.4 | 184.1 | 130.7   | 185.1   | 254.9   | blue        |
| 157 | LPC(20:0)   | 580.4 | 184.1 | 199.1   | 277.9   | 402.6   | blue        |
| 158 | LPC(20:1)   | 550.4 | 184.1 | 276.1   | 422.2   | 669.1   | blue        |
| 159 | LPC(20:2)   | 548.3 | 184.1 | 462.9   | 606.9   | 809.1   | blue        |
| 160 | LPC(20:3)   | 546.3 | 184.1 | 1696.1  | 2292.2  | 2965.9  | blue        |
| 161 | LPC(20:4)   | 544.3 | 184.1 | 5676.2  | 7465.4  | 9520.5  | blue        |
| 162 | LPC(20:5)   | 542.3 | 184.1 | 285.8   | 480.5   | 758.6   | grey        |
| 163 | LPC(22:0)   | 552.4 | 184.1 | 32.9    | 52.2    | 79.7    | grey        |
| 164 | LPC(22:4)   | 572.3 | 184.1 | 118.6   | 165.7   | 240.7   | blue        |
| 165 | LPC(22:5)   | 570.3 | 184.1 | 86.2    | 128.4   | 193.5   | blue        |
| 166 | LPC(22:6)   | 568.3 | 184.1 | 1100.6  | 1610.4  | 2429.4  | blue        |
| 167 | LPC(24:0)   | 608.4 | 184.1 | 84.6    | 115.2   | 159.1   | blue        |
| 168 | LPC(P-16:0) | 480.3 | 184.1 | 23.7    | 72.4    | 118.3   | blue        |
| 169 | LPC(P-18:0) | 508.4 | 184.1 | 79.8    | 108.9   | 149.6   | blue        |
| 170 | SM(d32:1)   | 675.5 | 184.1 | 2978.7  | 3759.9  | 4633.9  | green       |
| 171 | SM(d32:2)   | 673.5 | 184.1 | 227.1   | 293.4   | 387.5   | yellow      |
| 172 | SM(d33:1)   | 689.5 | 184.1 | 1089.5  | 1336.6  | 1613.5  | yellow      |
| 173 | SM(d34:0)   | 705.6 | 184.1 | 2741.8  | 3143.7  | 3581.3  | green       |
| 174 | SM(d34:1)   | 703.6 | 184.1 | 46981.8 | 55629.3 | 64896.1 | green       |
| 175 | SM(d34:2)   | 701.5 | 184.1 | 5818.5  | 7445.1  | 8889.0  | green       |
| 176 | SM(d35:1)   | 717.6 | 184.1 | 658.8   | 813.8   | 994.2   | yellow      |
| 177 | SM(d35:2)   | 715.6 | 184.1 | 97.1    | 124.9   | 155.3   | yellow      |
| 178 | SM(d36:1)   | 731.6 | 184.1 | 9775.4  | 12148.5 | 14801.3 | green       |
| 179 | SM(d36:2)   | 729.6 | 184.1 | 6681.2  | 8676.9  | 10762.6 | green       |
| 180 | SM(d36:3)   | 727.6 | 184.1 | 554.6   | 692.5   | 821.7   | green       |
| 181 | SM(d37:1)   | 745.6 | 184.1 | 778.3   | 1023.1  | 1325.9  | yellow      |
| 182 | SM(d37:2)   | 743.6 | 184.1 | 188.2   | 241.8   | 318.2   | yellow      |
| 183 | SM(d38:0)   | 761.6 | 184.1 | 1092.0  | 1317.8  | 1545.4  | green       |

|     |           |       |       |         |         |         |        |
|-----|-----------|-------|-------|---------|---------|---------|--------|
| 184 | SM(d38:1) | 759.6 | 184.1 | 11963.5 | 14628.2 | 17368.4 | green  |
| 185 | SM(d38:2) | 757.6 | 184.1 | 5241.9  | 6632.6  | 8021.2  | cyan   |
| 186 | SM(d38:3) | 755.6 | 184.1 | 239.2   | 303.6   | 370.8   | yellow |
| 187 | SM(d39:1) | 773.6 | 184.1 | 2441.0  | 3126.7  | 3923.9  | yellow |
| 188 | SM(d39:2) | 771.6 | 184.1 | 479.1   | 629.9   | 797.8   | yellow |
| 189 | SM(d40:0) | 789.7 | 184.1 | 2222.7  | 2751.3  | 3297.6  | green  |
| 190 | SM(d40:1) | 787.6 | 184.1 | 28946.8 | 34791.8 | 42734.0 | green  |
| 191 | SM(d40:2) | 785.6 | 184.1 | 19444.3 | 23572.9 | 28792.9 | green  |
| 192 | SM(d40:3) | 783.6 | 184.1 | 1258.9  | 1586.1  | 1972.2  | cyan   |
| 193 | SM(d40:4) | 781.6 | 184.1 | 220.4   | 273.4   | 340.6   | grey   |
| 194 | SM(d41:1) | 801.7 | 184.1 | 9726.8  | 12546.3 | 15729.5 | grey   |
| 195 | SM(d41:2) | 799.6 | 184.1 | 5172.4  | 6478.4  | 8085.6  | grey   |
| 196 | SM(d42:1) | 815.7 | 184.1 | 23195.8 | 27974.2 | 33366.5 | green  |
| 197 | SM(d42:2) | 813.7 | 184.1 | 49006.0 | 63147.3 | 81520.8 | cyan   |
| 198 | SM(d42:3) | 811.6 | 184.1 | 23443.6 | 30874.6 | 38871.3 | cyan   |
| 199 | SM(d42:4) | 809.6 | 184.1 | 1818.2  | 2648.7  | 4718.4  | grey   |

---
